# Supplementary material
Source: PubMed Central journal article supplement (PMC5470425)
Supplement: jamasurg-152-351-s001.pdf [file jamasurg-152-351-s001.pdf]

## Supplementary Online Content

Pezy P, Flaris AN, Prat NJ, et al. Fixed-distance model for balloon placement during fluoroscopy-free resuscitative endovascular balloon occlusion of the aorta in a civilian population. *JAMA Surg*. Published online December 14, 2016.  
doi:10.1001/jamasurg.2016.4757

**eFigure.** Route of the central axis of the aorta, plotted with OsiriX

This supplementary material has been provided by the authors to give readers additional information about their work.

**eFigure. Route of the central axis of the aorta, plotted with OsiriX.**

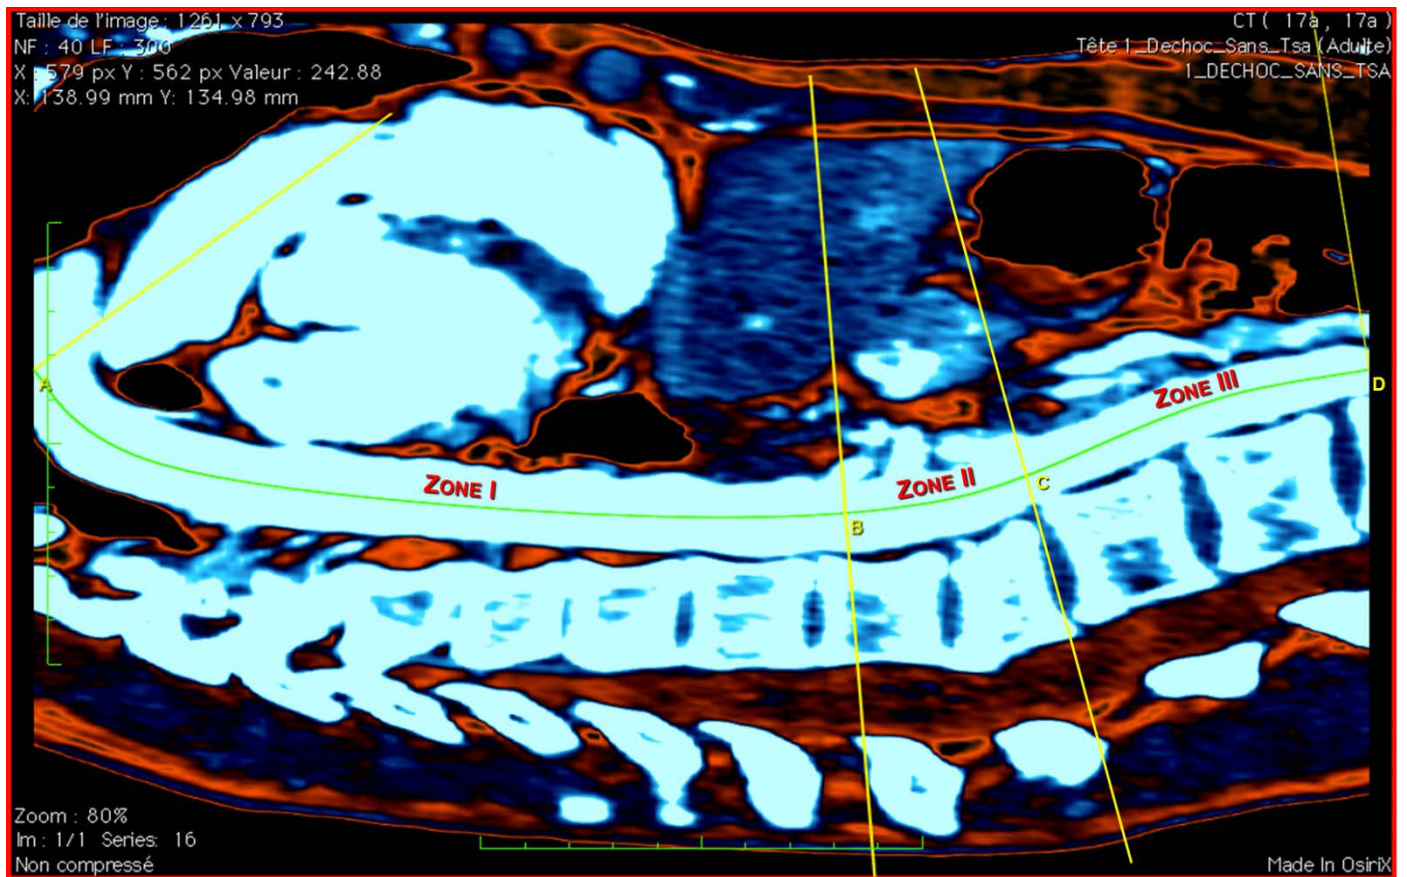

The yellow lines intersect the central axis at the origin of the main branches of the aorta used to limit each zone. A: origin of the left subclavian artery ; B: origin of the celiac trunk ; C: origin of the lower renal artery ; D: aortic bifurcation.
